# Supplementary material for: A chitosan-based hydrogel loaded with fenofibrate for diabetic wound healing
Source: Royal Society of Chemistry journal article supplement (doi:10.1039/d4bm00499j), 2024-01-01
Supplement: d4bm00499j1.pdf [file d4bm00499j1.pdf]

## Chitosan-based hydrogel loaded with fenofibrate for diabetic wound

### healing

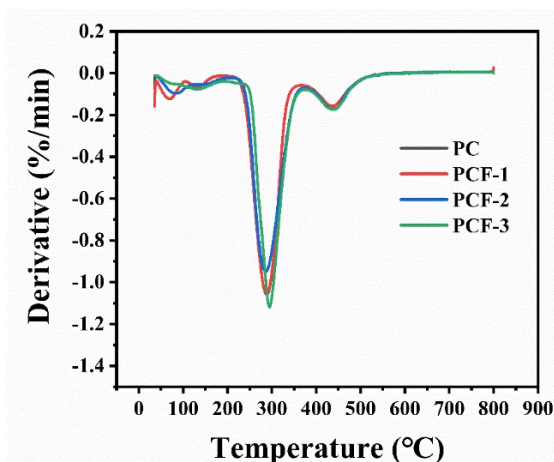

Fig. S1. DTG of PC, PCF-1, PCF-2, and PCF-3 hydrogel.

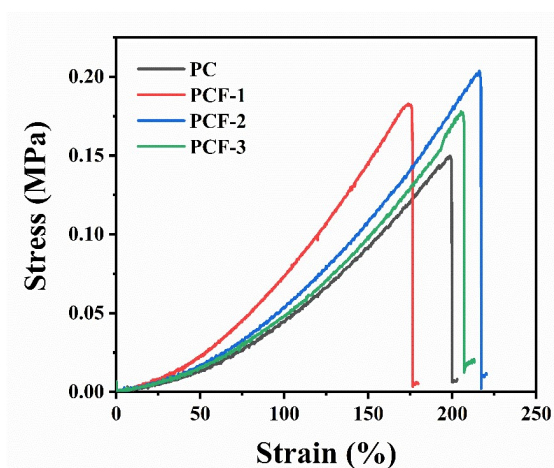

Fig. S2. Tensile stress-strain curves of PC, PCF-1, PCF-2, PCF-3 hydrogel.

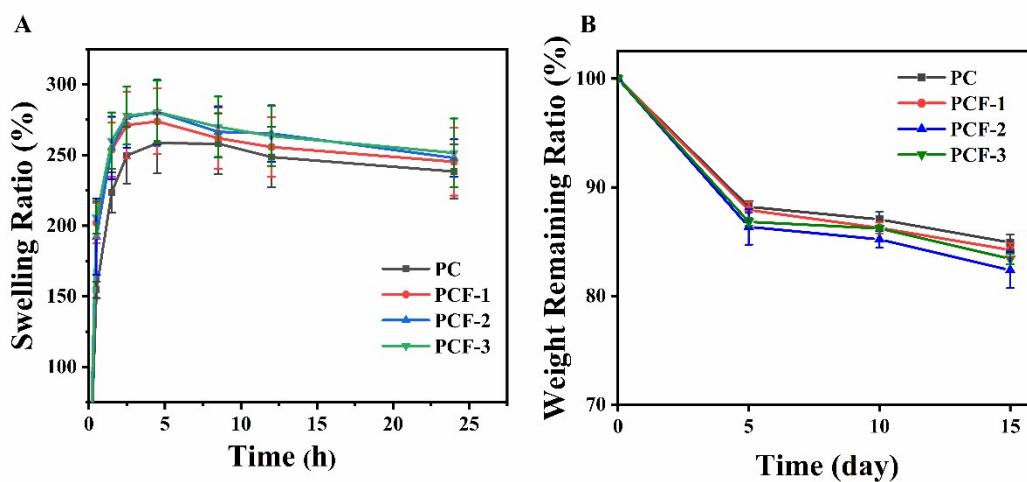

Fig. S3. Swelling ratio (A) and weight remaining ratio (B) of hydrogels.

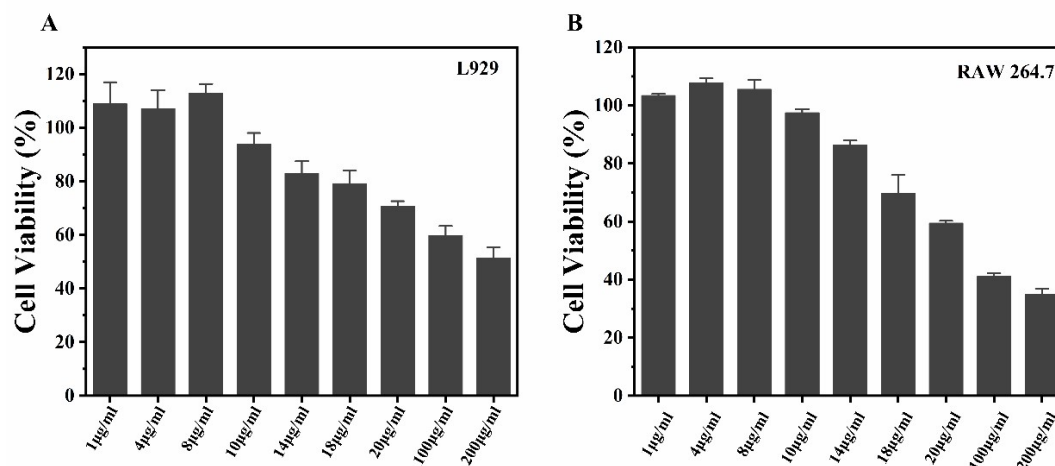

**Fig. S4.** The 24-hour cytotoxicity of FEN on L929 cells (A) and RAW 264.7 cells (B).

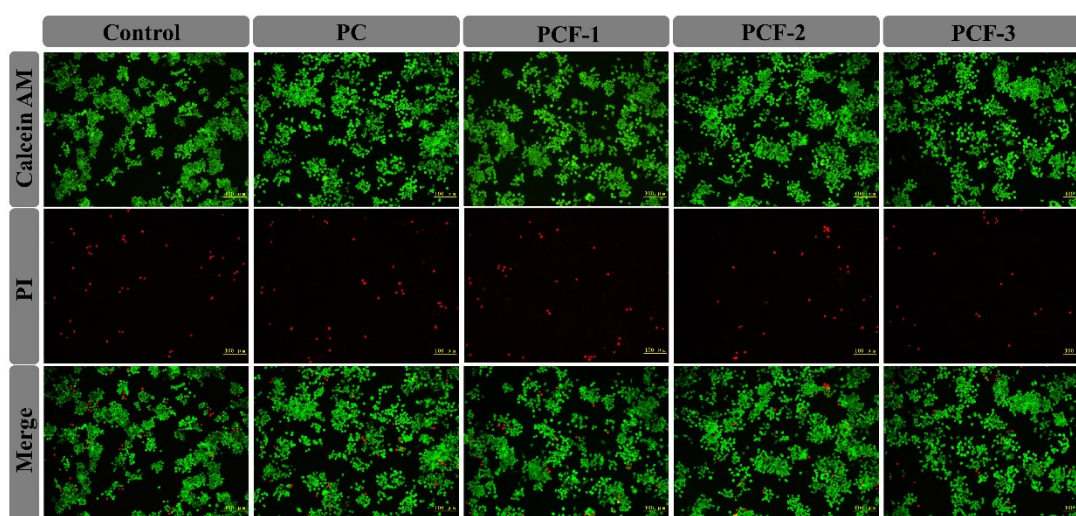

**Fig. S5.** Representative images of live/dead staining of RAW 264.7 cells in the presence of hydrogels extracts (scale bar: 100 µm).
